# Supplementary material for: A perfect match between borophene and aluminium in the AlB3 heterostructure with covalent Al–B bonds, multiple Dirac points and a high Fermi velocity
Source: Chem Sci. 2021 Dec 20;13(4):1016–22. doi: 10.1039/d1sc05207a (PMC8790795; doi:10.1039/d1sc05207a)
Supplement: SC-013-D1SC05207A-s001 [file SC-013-D1SC05207A-s001.pdf]

## **Electronic Supplementary Information**

### **Perfect match between borophene and aluminium in $\text{AlB}_3$ heterostructure with covalent Al-B bonds, multiple Dirac points and high Fermi velocity**

Yalong Jiao<sup>1,#</sup>, Fengxian Ma<sup>2,#</sup>, Xiaolei Zhang<sup>2</sup>, Thomas Heine<sup>1,3,4,\*</sup>

<sup>1</sup>Faculty for Chemistry and Food Chemistry, TU Dresden, Bergstraße 66c, 01069 Dresden, Germany

<sup>2</sup>College of Physics, Hebei Key Laboratory of Photophysics Research and Application, Hebei Normal University, 050024 Shijiazhuang, China

<sup>3</sup>Helmholtz-Center Dresden Rossendorf, Institute of Resource Ecology, Leipzig Research Branch, 04316 Leipzig, Germany

<sup>4</sup>Department of Chemistry, Yonsei University, 03722 Seoul, Korea

\*E-mail: [thomas.heine@tu-dresden.de](mailto:thomas.heine@tu-dresden.de)

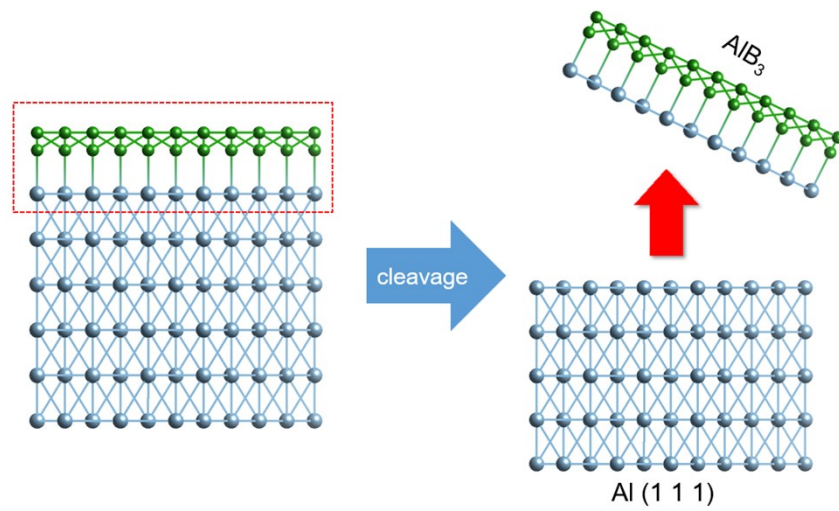

Fig. S1 Illustration of cleaving the  $\text{AlB}_3$  structure from the  $\text{Al} (1\ 1\ 1)$  surface.

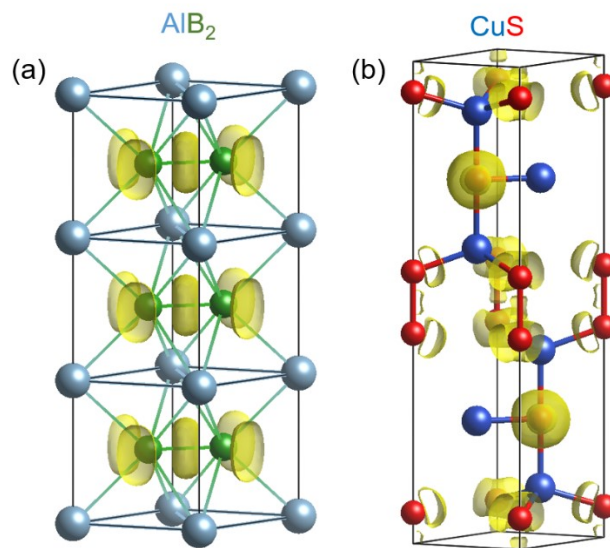

Fig. S2 ELF of the experimentally realised (a)  $\text{AlB}_2$  and (b)  $\text{CuS}$  crystal. The isosurface is set to 0.75.

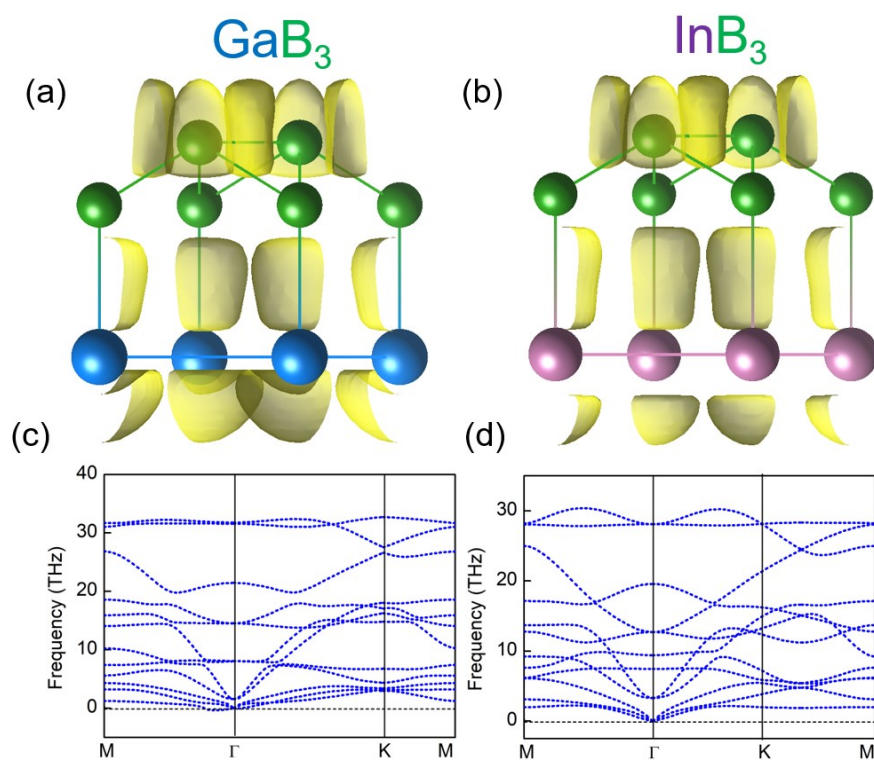

Fig. S3 (a-b) ELF of the GaB<sub>3</sub> and InB<sub>3</sub> heterostructures, where the covalent bands can be seen between the metal and boron atoms. (c-d) The phonon spectrum for the two heterolayers.

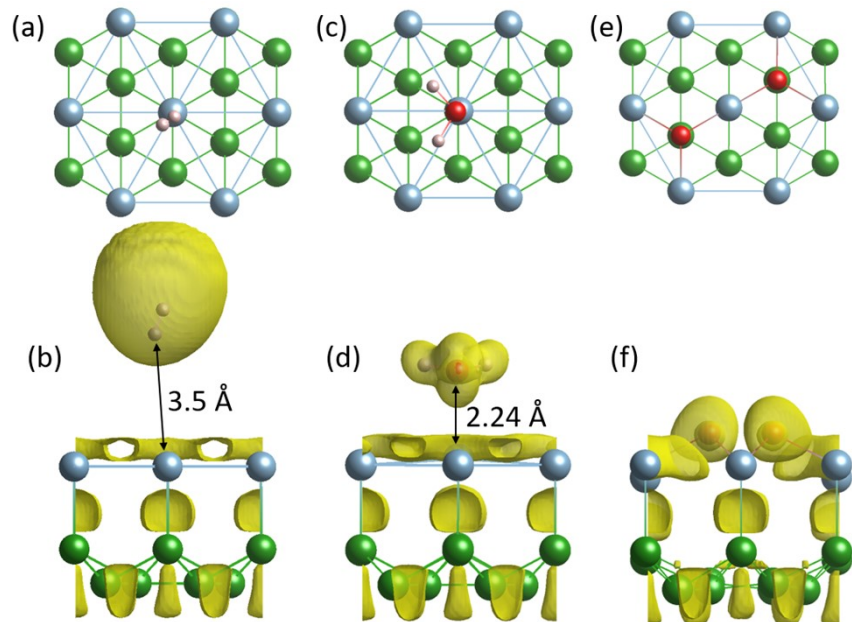

Fig. S4 (a, b, c) Molecule (H<sub>2</sub>, O<sub>2</sub>, H<sub>2</sub>O) adsorption on the AlB<sub>3</sub> layer and (b,d,f) their corresponding ELF with the iso-value 0.75.

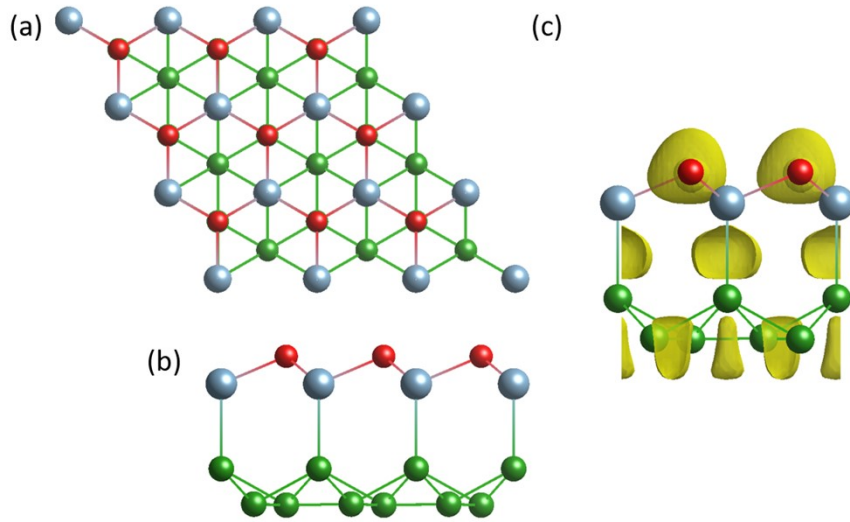

Fig. S5 (a-b) Geometry of fully oxidized  $\text{AlB}_3$  heterosheet and (c) its ELF with the isovalue 0.75.

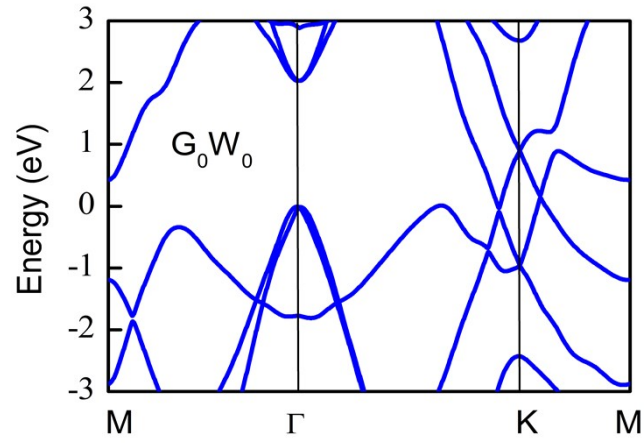

Fig. S6 Band structures of the  $\text{AlB}_3$  heterosheet by  $G_0W_0$  method.

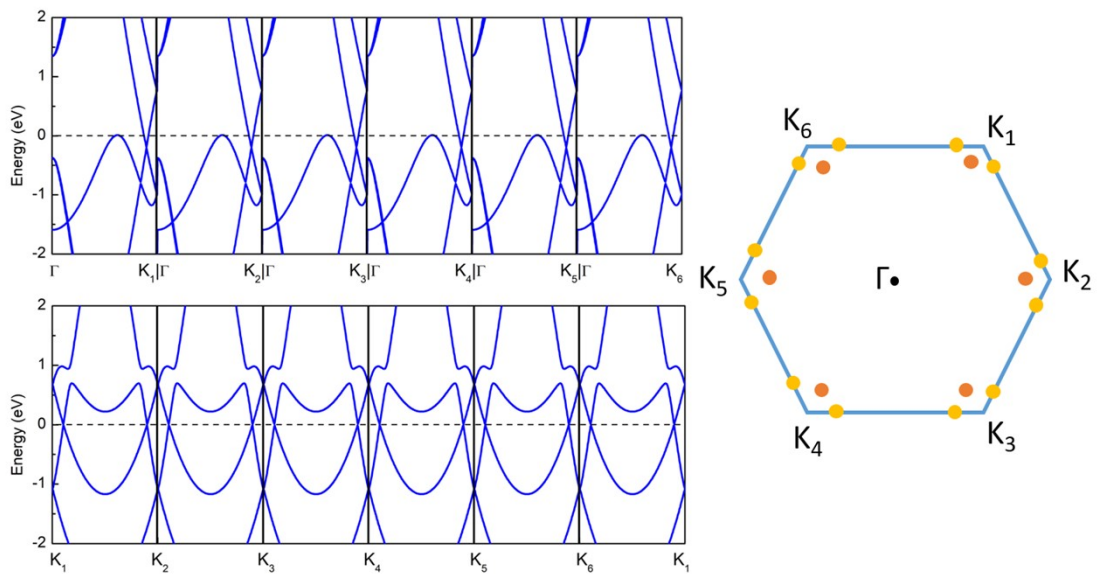

Fig. S7 Band structures of the  $\text{AlB}_3$  heterosheet along selected K point paths.

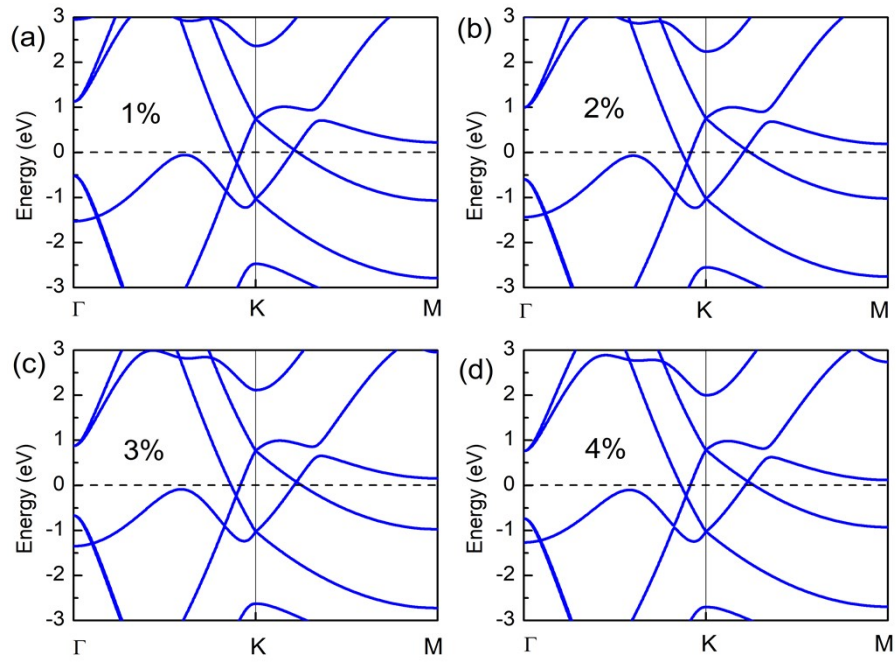

Fig. S8 Band structures of the  $\text{AlB}_3$  heterosheet when biaxial strain was applied.

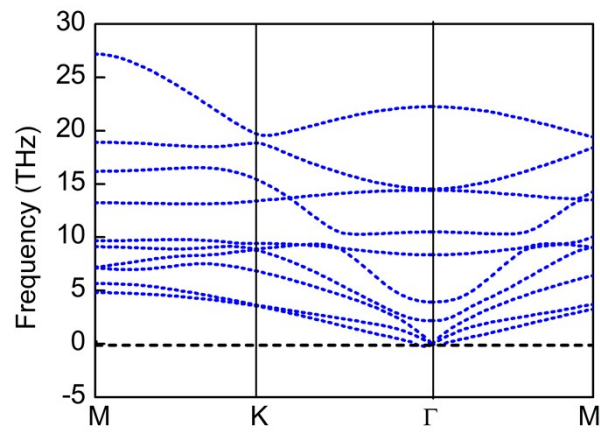

Fig. S9 The phonon band dispersion of  $\text{AlB}_3$  heterosheet.

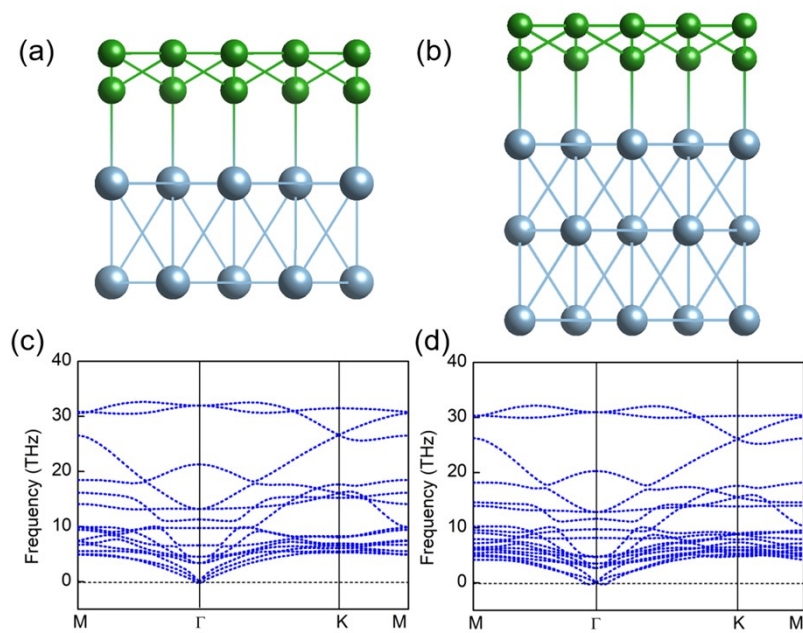

Fig. S10 (a-b) Side view of the bilayer/trilayer Al + borophene system and (c-d) their corresponding phonon spectrum.

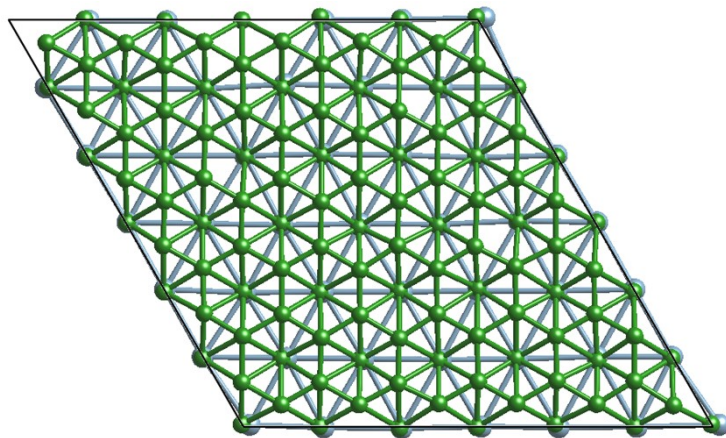

Fig. S11 The AIMD snapshot of AlB<sub>3</sub> heterosheet at 300 K after 10 ps.

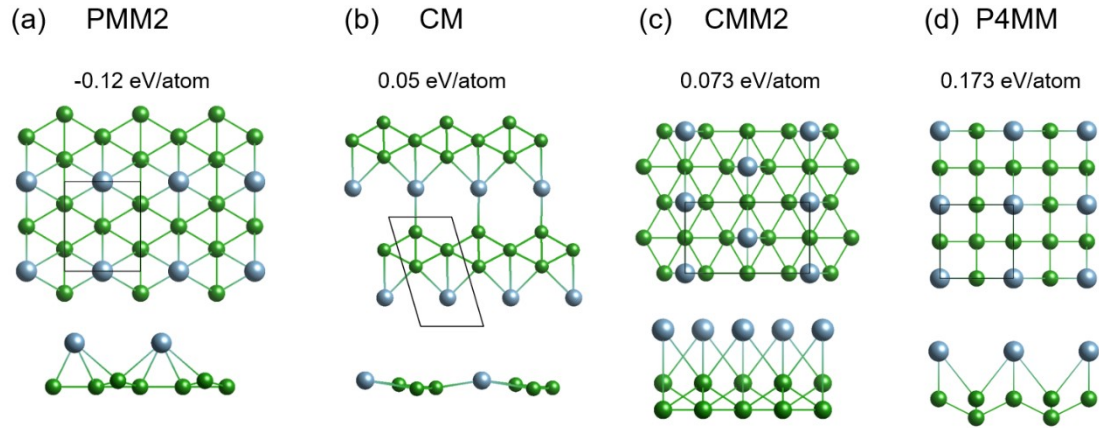

Fig. S12 (a-d) Top and side views of the  $\text{AlB}_3$  allotropes obtained from structure search. The space group and relative energy with respect to the  $\text{AlB}_3$  heterostructure in the main text (P6MM phase) are presented as well.

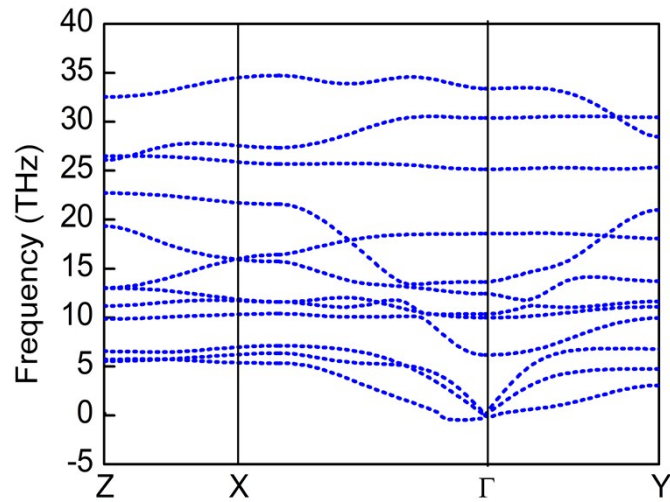

Fig. S13 Phonon spectrum for the PMM2  $\text{AlB}_3$  sheet, calculated using a  $(6 \times 4 \times 1)$  super cell. The plot shows the remainder of an imaginary branch that shrinks from smaller to larger super cells and that we attribute to the self-interaction of the displaced atom.

Table S1. The elastic constants (in  $\text{GPa} \cdot \text{nm}$ ) of the  $\text{AlB}_3$  heterosheet.

| Phase          | $C_{11}$ | $C_{22}$ | $C_{66}$ | $C_{12}$ |
|----------------|----------|----------|----------|----------|
| $\text{AlB}_3$ | 269.45   | 270.88   | 115.6    | 40.42    |
